# Supplementary material
Source: publisher figshare collection journal article supplement (https://tandf.figshare.com/articles/dataset/_/21591233)
Supplement: Supplementary file 1 [file 1]

Archive with 3 entries (3 files):
- irnf_a_2147673_sm0004.pdf
- irnf_a_2147673_sm9963.pdf
- irnf_a_2147673_sm9953.jpg
