# Supplementary material
Source: publisher figshare collection journal article supplement (https://tandf.figshare.com/articles/dataset/_/21591233)
Supplement: Supplementary file 1 [file 1 › irnf_a_2147673_sm0004.pdf]

Supplementary Table 2 Clinical characteristics of patients with anti-GBM disease by ANCA positivity

| Variables                             | Anti-GBM alone<br>(n=61) | Double positive<br>(n=15) | <i>p</i> |
|---------------------------------------|--------------------------|---------------------------|----------|
| Male (n, %)                           | 27 (44.3%)               | 7 (46.7%)                 | 0.867    |
| Age (years)                           | 56 (41.5, 67.5)          | 68.0 (61.0, 74.0)         | 0.030    |
| Duration of renal<br>disease (months) | 1.0 (0.5, 2.0)           | 1.0 (0.5, 2.0)            | 0.967    |
| Oliguria/anuria<br>(n, %)             | 18 (29.5%)               | 3 (20.0%)                 | 0.538    |
| Macroscopic<br>hematuria (n, %)       | 24 (39.3%)               | 5 (33.3%)                 | 0.668    |
| Initial RRT (n, %)                    | 42 (68.9%)               | 13 (86.7%)                | 0.212    |
| Serum creatinine<br>(μmol/L)          | 589.1 (314.0, 875.5)     | 698.8 (429.9, 814.7)      | 0.643    |
| eGFR<br>(mL/min/1.73m <sup>2</sup> )  | 6.7 (4.4, 15.6)          | 5.4 (4.4, 10.2)           | 0.407    |
| CRP (mg/L)                            | 34.4 (6.4, 120.3)        | 19.7 (4.4, 83.6)          | 0.557    |
| RF (IU/mL)                            | 10.7 (9.7, 11.4)         | 10.8 (9.5, 21.2)          | 0.840    |
| Serum Albumin<br>(g/L)                | 28.3 (23.5, 32.1)        | 28.5 (25.9, 34.2)         | 0.588    |
| Hemoglobin<br>(g/L)                   | 85.0 (74.5, 103.5)       | 83.0 (74.0, 86.0)         | 0.354    |
| Urine red blood<br>cell (/μL)         | 942.0 (324.8, 2371.9)    | 829.0 (146.7, 1871.0)     | 0.705    |
| urine protein<br>(g/24h)              | 1.32 (0.50, 3.98)        | 0.68 (0.44, 2.26)         | 0.267    |
| Lung<br>involvement                   | 18 (29.5%)               | 4 (26.7%)                 | 1.000    |

---

(n, %)

---

eGFR, estimated glomerular filtration rate; RRT, renal replacement therapy; CRP, C-reactive protein; RF, rheumatoid factors.

Among 15 double positive patients, the immunofluorescence of the 5 patients receiving renal biopsy mainly showed that IgG deposited linearly along GBM. Electron microscopy showed that there was no electronic dense deposit.

Oliguria was defined as urinary output of <400 mL/24h while anuria was defined as urinary output of <100 mL/24h

The Hospital Reference Laboratory normal range for anti-GBM antibody was 0-20 RU/ml; CRP was 0-8 mg/L; RF was 0–20 IU/ml; and urine red blood cell was 0-17/ $\mu$ L.
