# Supplementary material
Source: publisher figshare collection journal article supplement (https://tandf.figshare.com/articles/dataset/_/21591233)
Supplement: Supplementary file 1 [file 1 › irnf_a_2147673_sm9963.pdf]

Supplementary Table 1 Pathological features of different histopathological types of anti-GBM disease in 38 patients undergoing renal biopsy

|                                               | Focal<br>(n=6)    | Mixed<br>(n=5)    | Crescentic<br>(n=22)         | Sclerotic<br>(n=5)               | <i>p</i>          |
|-----------------------------------------------|-------------------|-------------------|------------------------------|----------------------------------|-------------------|
| Total glomeruli                               | 18.5 (15.0, 30.5) | 13.0 (8.5, 24.0)  | 19.0 (15.0, 26.0)            | 12.0 (10.5, 21.0)                | 0.355             |
| Normal glomeruli (%)                          | 71.4 (63.2, 89.6) | 17.8 (3.8, 33.9)  | 5.8 (0.0, 11.7) <sup>a</sup> | 0.0 (0.0, 15.3) <sup>a</sup>     | <b>&lt; 0.001</b> |
| Global sclerotic glomeruli (%)                | 8.5 (0, 13.0)     | 20.0 (0, 35.0)    | 0.0 (0, 6.9)                 | 66.7 (55.8, 84.3) <sup>a,c</sup> | <b>&lt; 0.001</b> |
| Cellular crescents (%)                        | 9.2 ± 10.9        | 27.4 ± 16.6       | 76.7 ± 15.6 <sup>a,b</sup>   | 11.2 ± 12.7 <sup>c</sup>         | <b>&lt; 0.001</b> |
| Acute tubulointerstitial lesions score        | 1.5 (1.0, 2.3)    | 3.0 (2.0, 3.0)    | 3.0 (3.0, 3.0) <sup>a</sup>  | 3.0 (2.5, 3.0) <sup>a</sup>      | <b>&lt; 0.001</b> |
| Chronic tubulointerstitial lesions score      | 1.0 (1.0, 1.0)    | 2.0 (1.0, 2.0)    | 1.0 (1.0, 1.0)               | 2.0 (1.5, 2.0)                   | <b>0.038</b>      |
| Tubular atrophy and Interstitial fibrosis (%) | 25.0 (13.8, 32.5) | 30.0 (22.5, 35.0) | 22.5 (20.0, 25.0)            | 50.0 (40.0, 50.0) <sup>a,c</sup> | <b>0.002</b>      |

<sup>a</sup>Focal versus mixed, crescentic, and sclerotic ( $p < 0.05$ ).

<sup>b</sup>Mixed versus crescentic and sclerotic ( $p < 0.05$ ).

<sup>c</sup>Crescentic versus sclerotic ( $p < 0.05$ ).
