# Supplementary material
Source: publisher figshare collection journal article supplement (https://tandf.figshare.com/articles/dataset/_/21591233)

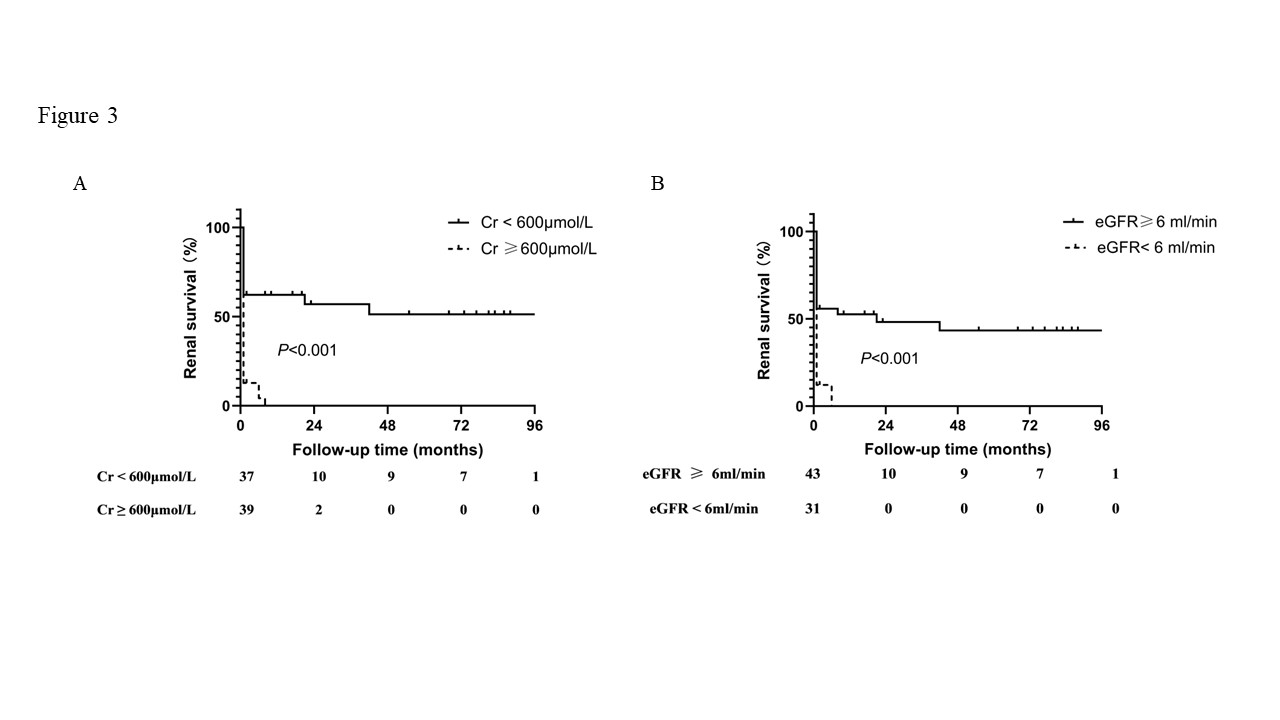

Supplement: Supplementary file 1 [file 1 › irnf_a_2147673_sm9953.jpg]
